# Supplementary material for: Local euchromatin enrichment in lamina-associated domains anticipates their repositioning in the adipogenic lineage
Source: PubMed Central journal article supplement (PMC8996409; doi:10.1186/s13059-022-02662-6), 2022-04-11
Supplement: 13059_2022_2662_MOESM1_ESM.pdf [file 13059_2022_2662_MOESM1_ESM.pdf]

## Additional file 1

**Table S1.** Differentially expressed genes in each expression cluster. See **Additional file 2** (Excel).

**Table S2.** LAD class description over the 72 h differentiation time course.

| T00-T24     | T72   | No. domains | Coverage (Mb) | No. genes* | Genes* per Mb | % TSSs in LAD | No. expressed genes*§ | No. DE genes* |
|-------------|-------|-------------|---------------|------------|---------------|---------------|-----------------------|---------------|
| Lost LAD    | LAD   | 21          | 9.7           | 30         | 3.1           | 100           | 8                     | 7             |
|             | i-LAD | 32          | 9.0           | 49         | 5.4           | 96            | 20                    | 17            |
| Gained LAD  | LAD   | 98          | 52.6          | 177        | 3.3           | 98            | 25                    | 14            |
|             | i-LAD | 150         | 50.9          | 204        | 4.0           | 93            | 54                    | 44            |
| cLAD        | LAD   | 379         | 505.7         | 653        | 1.3           | 98            | 72                    | 72            |
|             | i-LAD | 326         | 52.2          | 174        | 3.3           | 99            | 44                    | 36            |
| Lost edge   | LAD   | 173         | 15.0          | 30         | 2.0           | 90            | 17                    | 6             |
|             | i-LAD | 254         | 28.4          | 191        | 6.7           | 81            | 90                    | 81            |
| Gained edge | LAD   | 245         | 60.3          | 80         | 1.3           | 1000          | 18                    | 12            |
|             | i-LAD | 295         | 49.3          | 246        | 5.0           | 91            | 106                   | 105           |

\*Protein-coding genes unique to each LAD class.

§Expressed genes are genes expressed at  $\geq 1$  time point in the 0-72 h time course.

||DE, differentially expressed (FDR  $\leq 0.05$ ).

**Table S3.** Observed and expected overlaps of T00-T24 LAD categories with LADs at 72 h.

| LAD category | Total cov. (Mb) | Observed overlap (Mb) | % Observed | Expected overlap (Mb) | % Expected | FDR-adj. P-value |
|--------------|-----------------|-----------------------|------------|-----------------------|------------|------------------|
| Lost LAD     | 18.8            | 9.72                  | 51.7       | 3.81                  | 20.3       | 0.01961          |
| Gained LAD   | 103.5           | 52.61                 | 50.8       | 24.11                 | 23.3       | 0.01961          |
| Common LAD   | 557.8           | 505.77                | 90.7       | 140.60                | 25.2       | 0.01961          |
| Lost edge    | 43.4            | 15.02                 | 34.6       | 10.69                 | 24.6       | 0.01961          |
| Gained edge  | 109.7           | 60.33                 | 55.0       | 27.63                 | 25.2       | 0.01961          |

Each LAD was permuted 50 times across the same chromosome using as background the union of all known LAD locations on the same chromosome in cells at T72; P-values are from two-sided permutation tests with FDR correction ( $\leq 0.1$ ) for multiple testing. Numbers of permutations are set by the 'Overlap' function of the Genomic HyperBrowser (<https://hyperbrowser.uio.no>) used to perform permutations.

**Table S4.** Observed and expected overlap of each LAD class with LADs in undifferentiated proliferating ASCs.

| LAD category        | Total cov. (Mb) | Observed overlap (Mb) | % Observed | Expected overlap (Mb) | % Expected | FDR-adj. P-value |
|---------------------|-----------------|-----------------------|------------|-----------------------|------------|------------------|
| Lost LAD > LAD      | 9.73            | 2.01                  | 20.6       | 2.36                  | 24.28      | 0.6255           |
| Lost LAD > i-LAD    | 9.03            | 0.25                  | 2.7        | 1.44                  | 15.95      | 0.9721           |
| Gained LAD > LAD    | 52.61           | 28.11                 | 53.4       | 13.44                 | 25.55      | 0.003984         |
| Gained LAD > i-LAD  | 50.92           | 20.51                 | 40.3       | 11.03                 | 21.66      | 0.003984         |
| Common LAD > LAD    | 505.78          | 436.89                | 86.4       | 127.5                 | 25.21      | 0.003984         |
| Common LAD > i-LAD  | 52.02           | 28.96                 | 55.7       | 13.03                 | 25.05      | 0.003984         |
| Lost edge > LAD     | 15.03           | 7.21                  | 47.9       | 3.81                  | 25.32      | 0.003984         |
| Lost edge > i-LAD   | 28.42           | 8.88                  | 31.3       | 7.08                  | 24.90      | 0.08367          |
| Gained edge > LAD   | 60.33           | 49.28                 | 81.7       | 16.26                 | 26.95      | 0.003984         |
| Gained edge > i-LAD | 49.37           | 30.98                 | 62.7       | 12.48                 | 25.28      | 0.003984         |

Each LAD was permuted 250 times across the same chromosome using as background the union of all known LAD locations on the same chromosome in proliferating ASCs; P-values are from two-sided permutation tests with FDR correction ( $\leq 0.1$ ) for multiple testing. Numbers of permutations are set by the 'Overlap' function of the Genomic HyperBrowser (<https://hyperbrowser.uio.no>) used to perform permutations.

**Table S5.** Protein-coding genes uniquely found in each LAD class. See **Additional file 2** (Excel).

**Table S6.** Summary of GO terms in LAD classes.

| LAD class                  | GO term (PANTHER, biol. Process) | P-value* |
|----------------------------|----------------------------------|----------|
| Lost LAD > LAD<br>(i)      | Neuronal differentiation         | 5.7E-05  |
|                            | Kidney cell function             | 4.3E-03  |
|                            | Cardiac function                 | 4.6E-03  |
|                            | Pancreas differentiation         | 8.7E-03  |
|                            | Liver development                | 1.0E-02  |
| Lost LAD > iLAD<br>(ii)    | Steroid metabolism               | 3.6E-04  |
|                            | Transcription                    | 1.3E-04  |
|                            | Fatty acid synthesis             | 1.3E-02  |
| Gained LAD > LAD<br>(iii)  | Detection of stimulus            | 5.5E-19* |
|                            | GPCR signaling                   | 1.5E-11* |
|                            | Cellular metabolic process       | 6.2E-10* |
| Gained LAD > iLAD<br>(iv)  | Detection of stimulus            | 1.5E-28* |
|                            | GPCR signaling                   | 1.1E-15* |
|                            | Cellular metabolism              | 4.6E-04* |
|                            | Regulation of transcription      | 1.5E-03* |
| cLAD > LAD<br>(v)          | Nervous system process           | 1.4E-13* |
|                            | GPCR signaling                   | 1.7E-13* |
|                            | Cellular metabolic process       | 4.3E-12* |
|                            | System process                   | 1.7E-11* |
| cLAD > iLAD<br>(vi)        | Detection of stimulus            | 4.5E-29* |
|                            | Nervous system process           | 8.2E-17* |
|                            | GPCR signaling                   | 1.0E-15* |
| Lost edge > LAD<br>(vii)   | Regulation of cardiac function   | 3.4E-04  |
|                            | Canonical Wnt signaling          | 2.9E-03  |
|                            | Developmental cell growth        | 7.7E-03  |
|                            | Mesodermal cell migration        | 8.7E-03  |
| Lost edge > iLAD<br>(viii) | Immune system process            | 3.6E-04  |
|                            | Organelle inheritance            | 5.8E-03  |
|                            | Fat cell differentiation         | 1.6E-02  |
|                            | Lipid phosphorylation            | 9.9E-03  |
| Gained edge > LAD<br>(ix)  | Metabolic process                | 2.1E-04  |
|                            | Mitochondrial function           | 2.2E-04  |
|                            | Brown fat cell differentiation   | 7.2E-03  |
| Gained edge > iLAD<br>(x)  | GPCR signaling                   | 8.8E-04  |
|                            | Oxidative phosphorylation        | 3.3E-03  |
|                            | Cellular metabolic process       | 7.6E-03  |

\*Fisher's exact tests with  $FDR \leq 0.05$ ; no star: no FDR correction. GO terms are for all genes in each LAD class irrespective of their expression status.

**Table S7.** Location of enhancers targeted to DE genes in each LAD class. See **Additional file 2** (Excel).

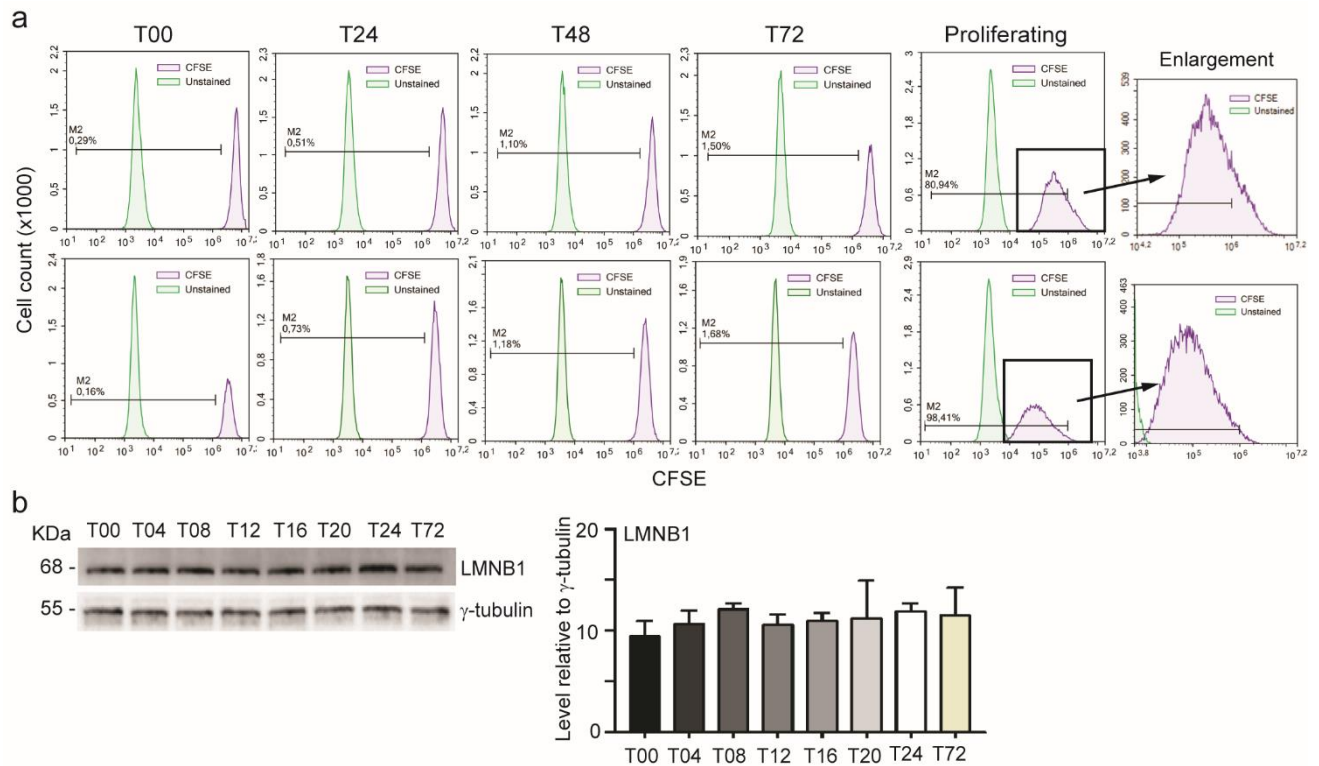

**Figure S1.** Cell proliferation and LMNB1 levels during early adipogenic differentiation. **a** Cell proliferation monitored by carboxyfluorescein succinimidyl ester (CFSE) during differentiation. Plots show cell counts as a function of CFSE fluorescence intensity in unstained and stained cells at indicated time points; data for two differentiation replicates (upper and lower rows). Proliferating ASCs were used as a dividing cell population control. M2, percentage of dividing cells in the population. **b** Western blot analysis of LMNB1 protein expression during differentiation;  $\gamma$ -tubulin was used as loading control; left, Quantification of LMNB1 Western blots as in (a) relative to  $\gamma$ -tubulin ( $n = 2$  differentiations).

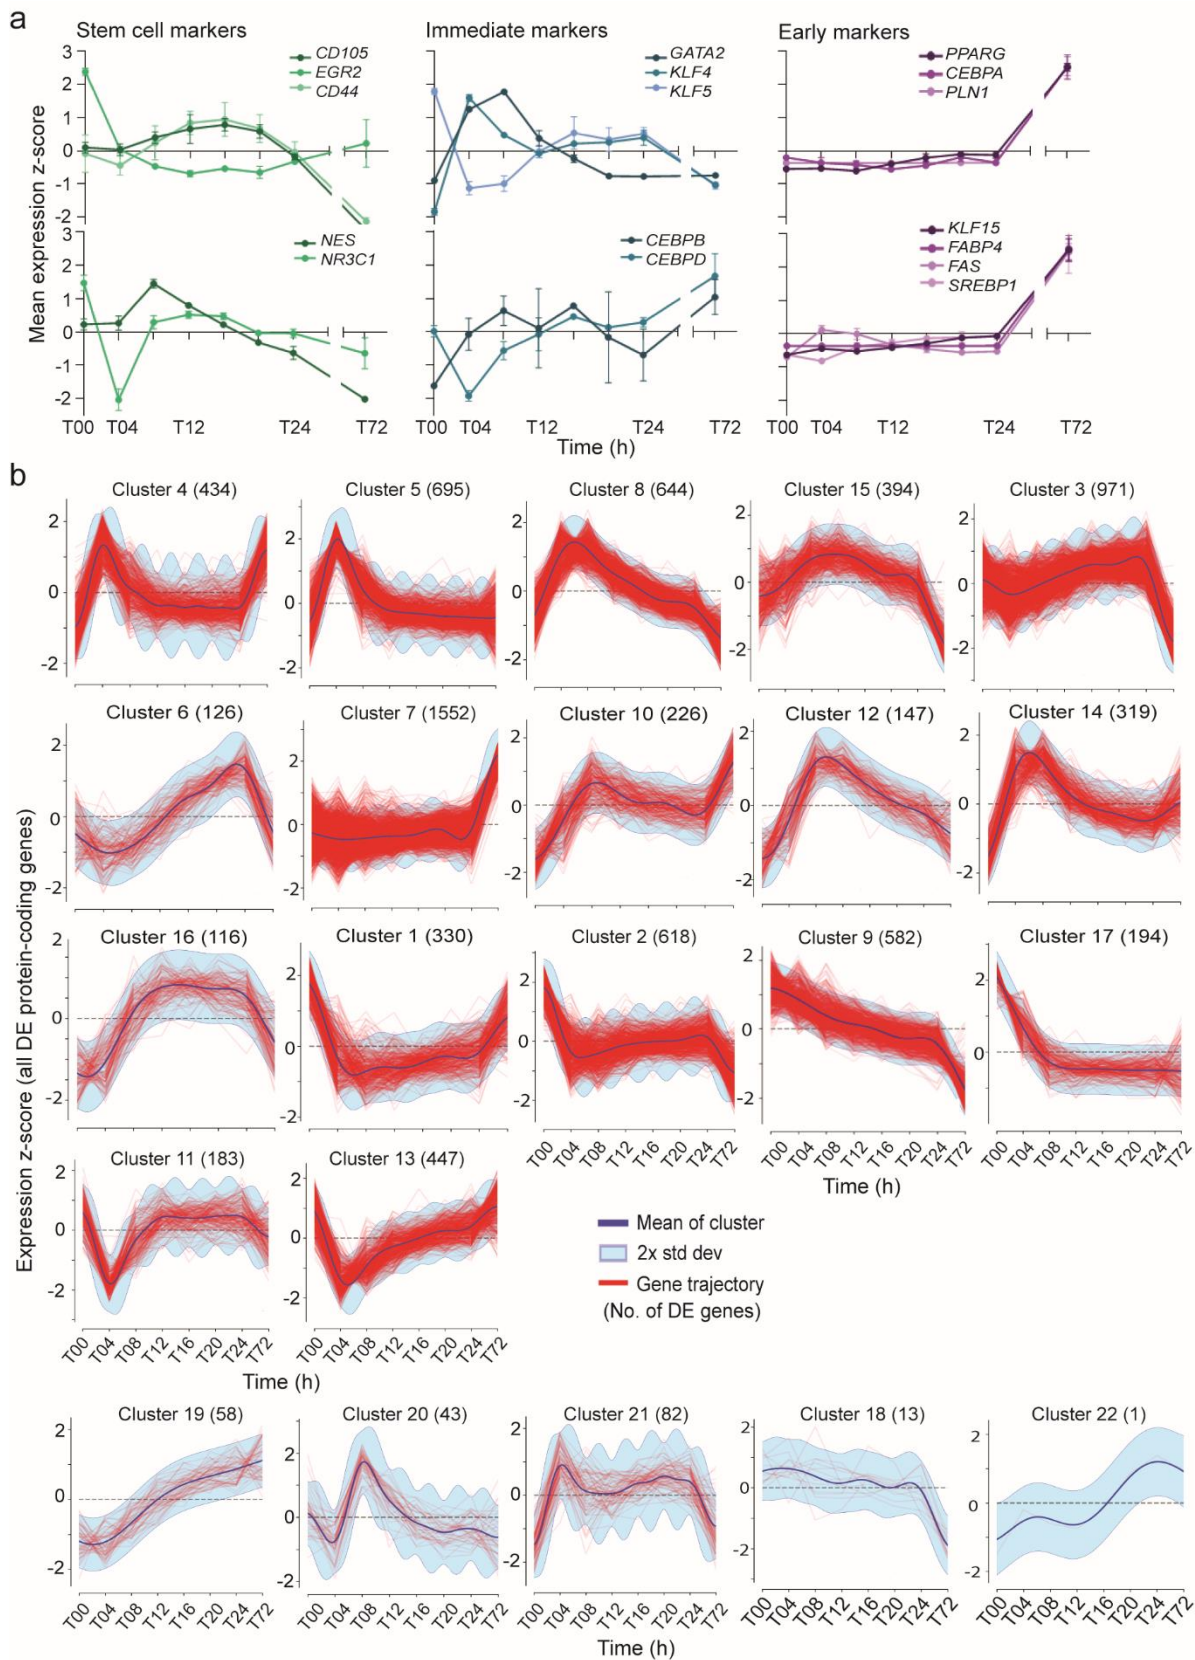

**Figure S2.** RNA-seq transcription profiling of early adipogenesis. **a** Expression z-score of stem cell, immediate and early adipogenic genes in the first 24 h of differentiation, and at 72 h; mean  $\pm$  SD of two differentiations. **b** Unsupervised gene expression clusters of all DE genes (No. of genes in cluster); clusters are ordered by row based on profiles.

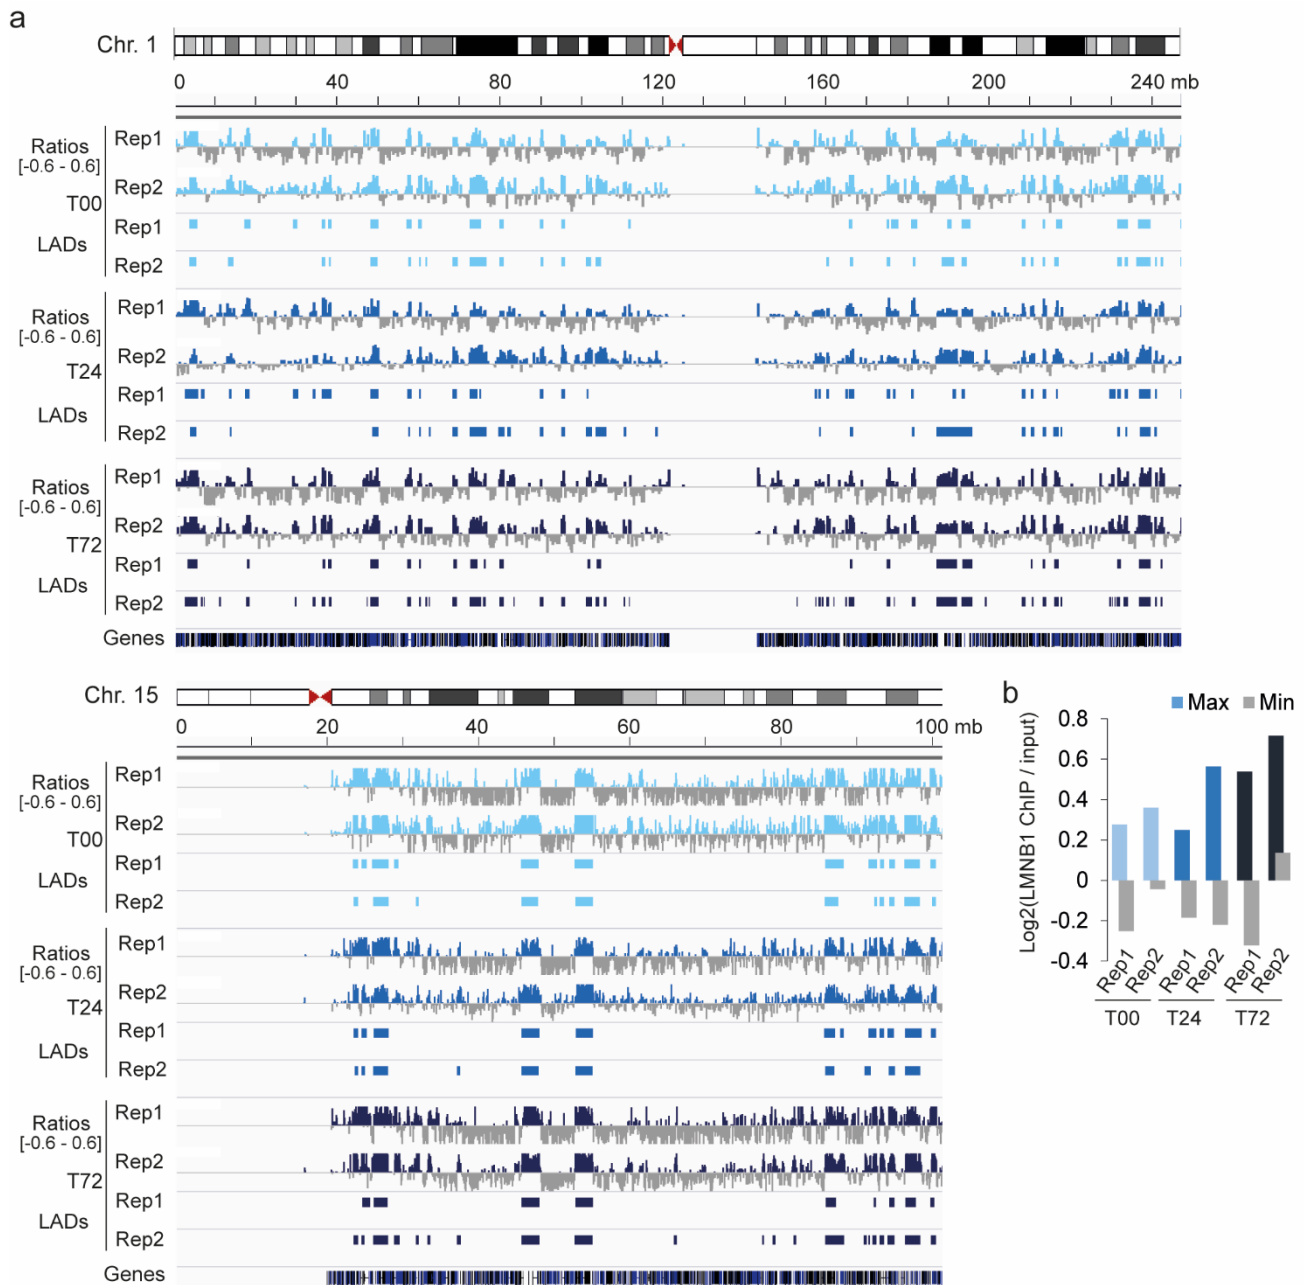

**Figure S3.** Profiles of genomic LMNB1 enrichment during differentiation. **a** Genome browser views of LMNB1 ChIP enrichment as  $\text{Log}_2(\text{ChIP}/\text{input})$  ratios and called LADs across chromosomes 1 and 15 for each differentiation replicate (Rep1, Rep2) at T00, T24 and T72;  $\text{Log}_2(\text{ChIP}/\text{input})$  ratio scale is shown in brackets. **b** Dynamic range of LMNB1 ChIP/input ratios ( $\text{Log}_2$ ) in each differentiation replicate.

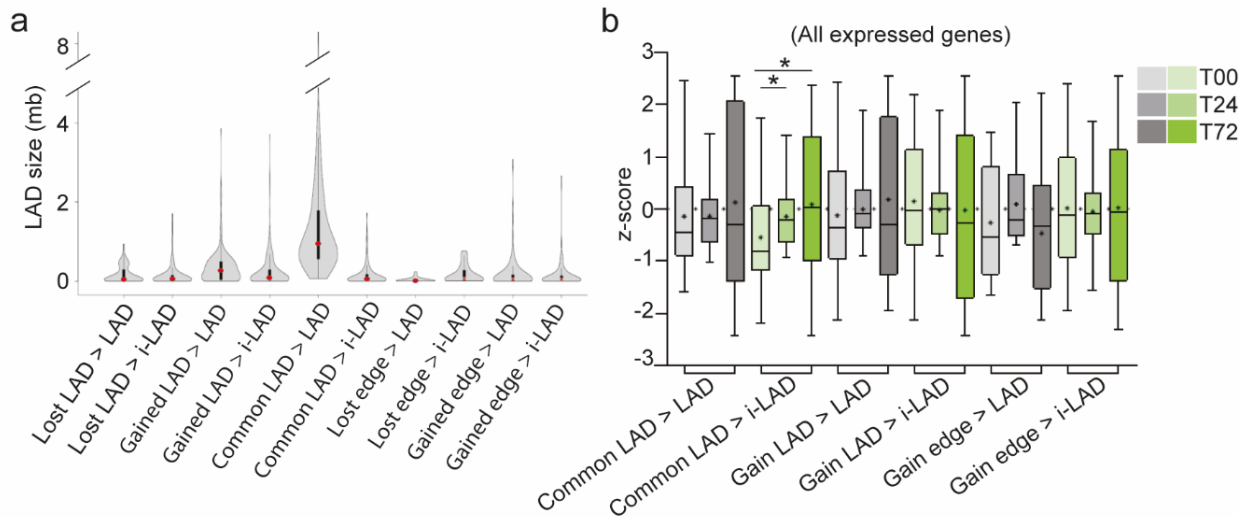

**Figure S4.** Characteristics of the LAD classes. **a** Violin and box plots of LAD size distribution in each LAD class; box plot: dot, median; thick bar, 25-75% percentile; whiskers, min-max. **b** Expression z-score of all expressed genes in indicated LAD classes at T00, T24 and T72. Bar, median; cross, mean; box, 25-75 percentile, whiskers min-max; \*P = 0.02, unpaired two-tailed t-test with Welch's correction.

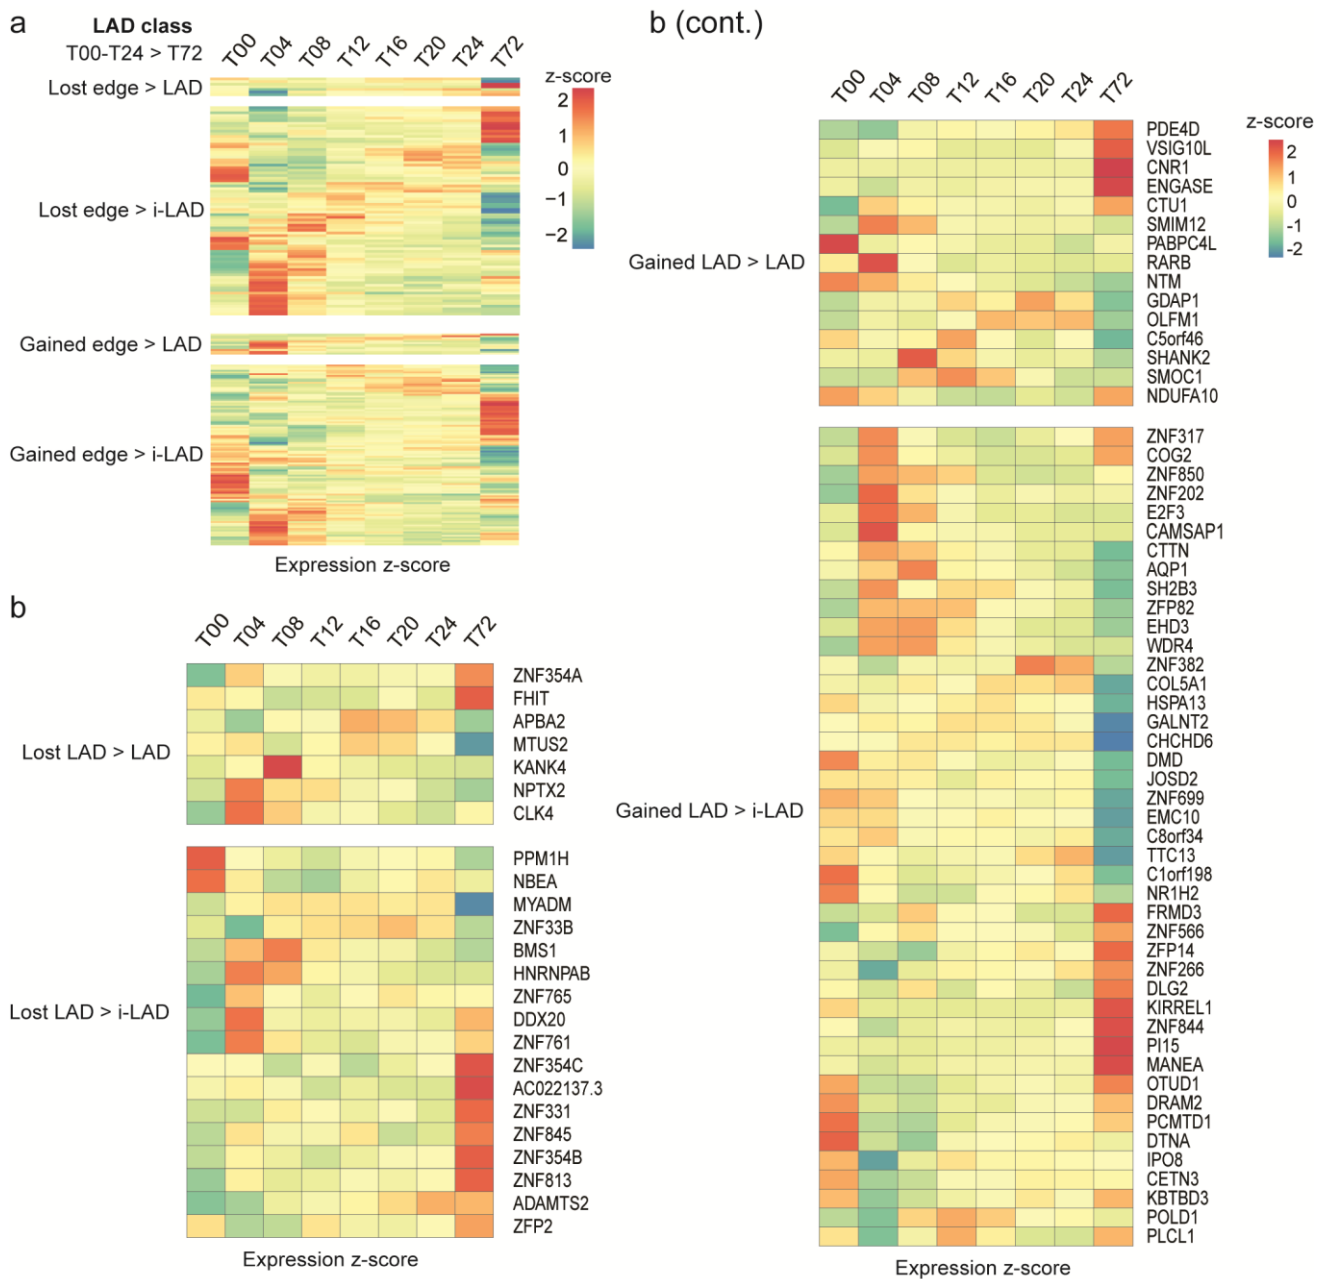

**Figure S5.** Expression profiles of individual DE genes in LAD classes. **a** Hierarchically clustered heatmaps of expression z-scores, scaled across time points in Lost/Gained edge LAD classes. **b-c** Clustered heatmaps of expression z-scores detailed for each gene, scaled across time points. Figure continues on the next two pages.



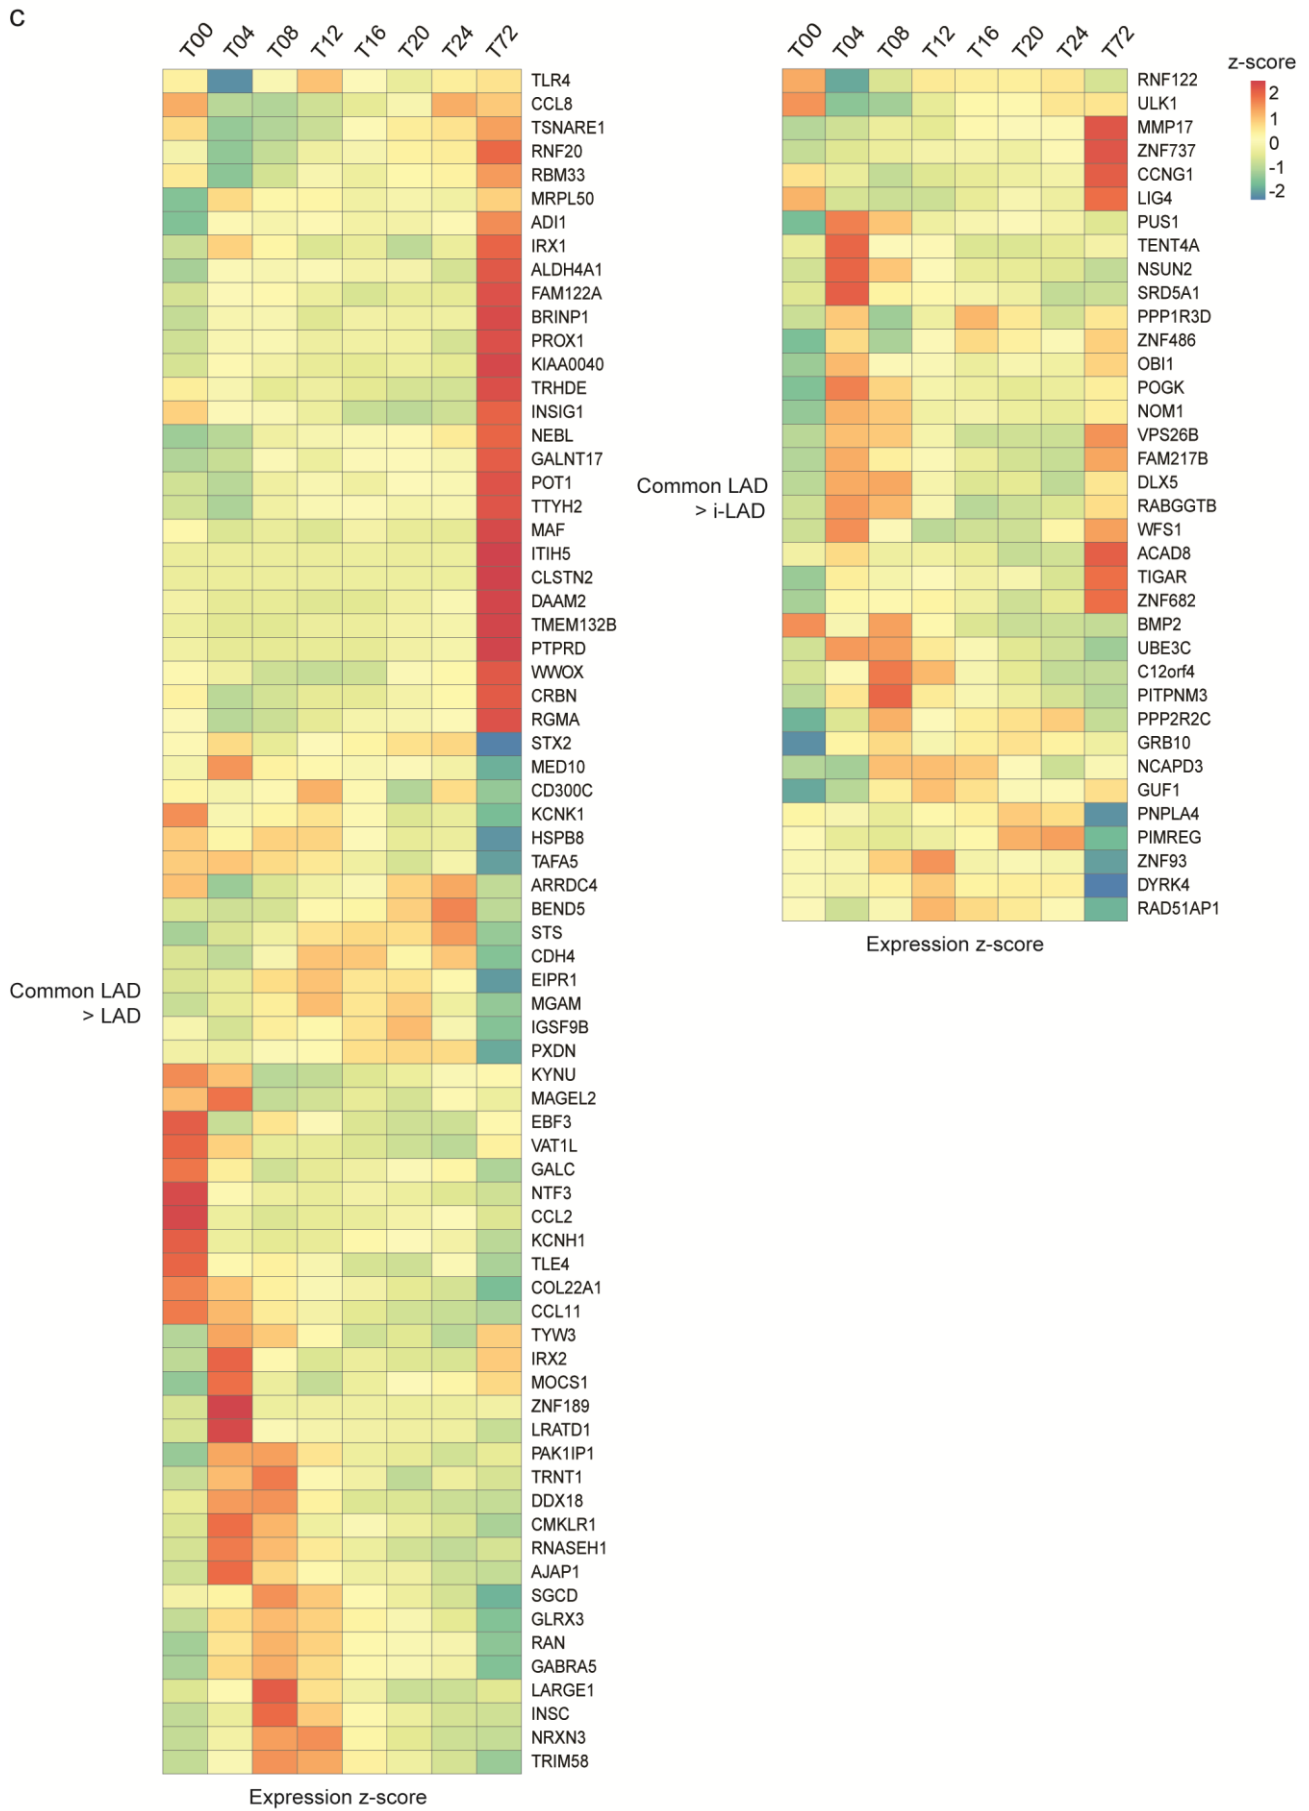

**Figure S5 (cont.)** Expression profiles of individual DE genes in each LAD class.

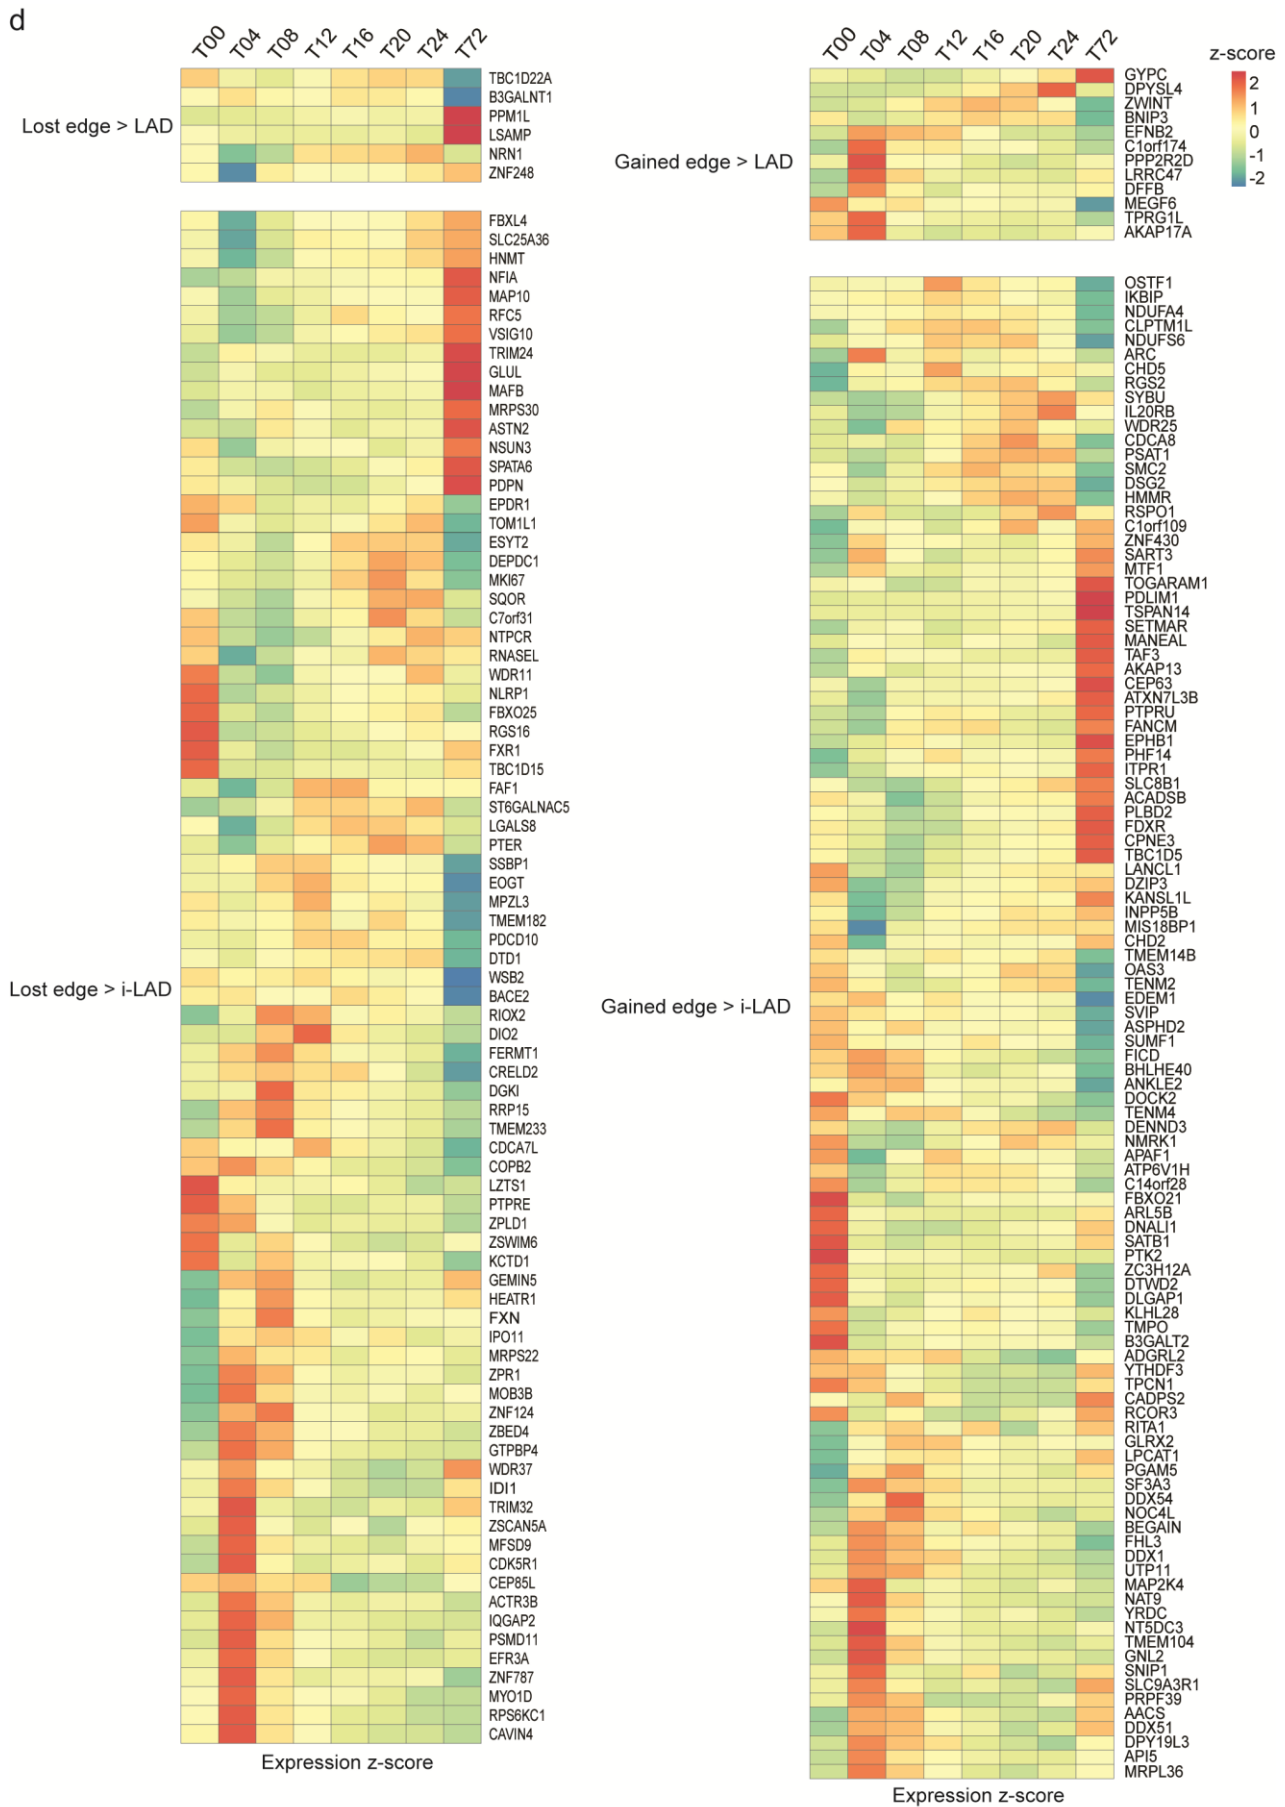

**Figure S5 (cont.)** Expression profiles of individual DE genes in each LAD class.

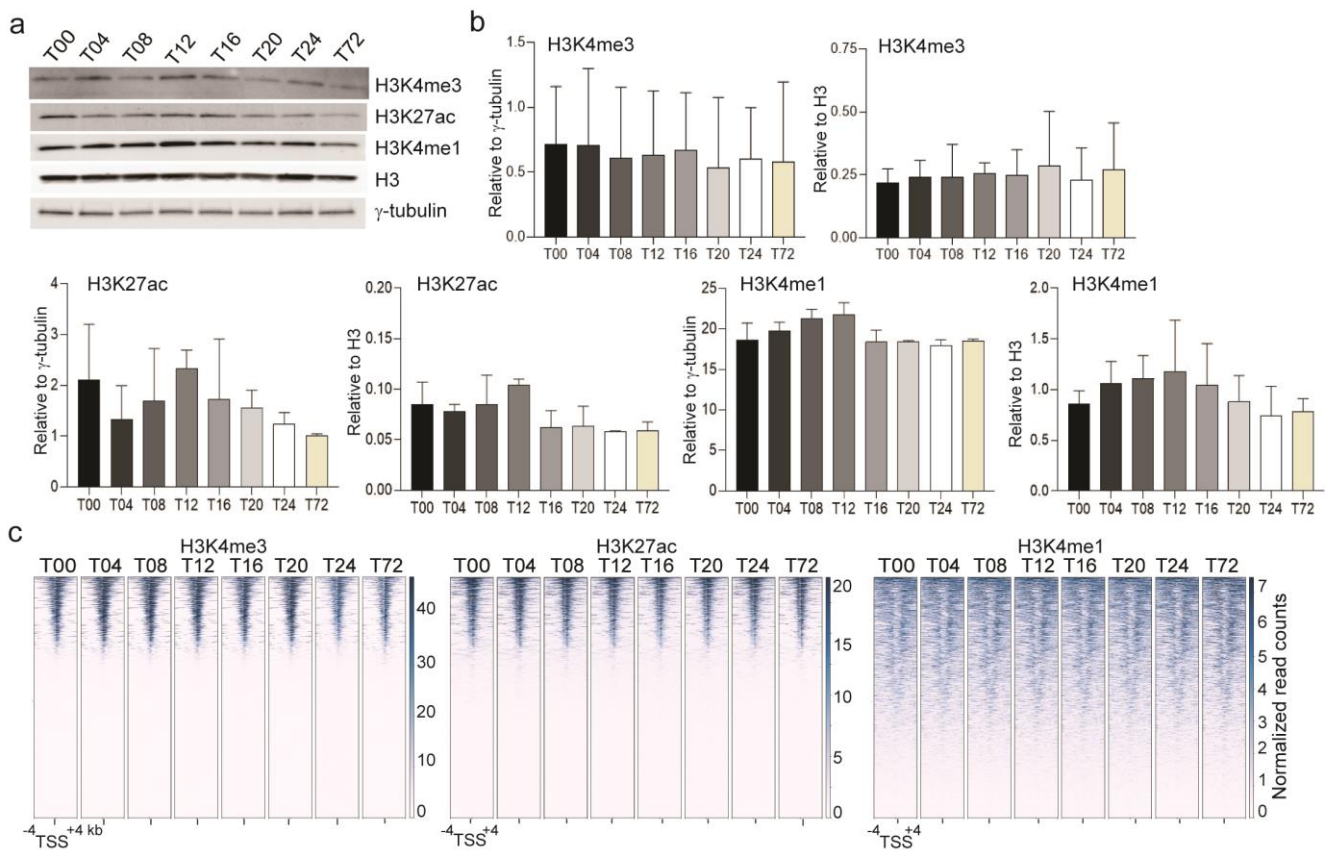

**Figure S6.** H3K4me3, H3K27ac and H3K4me1 levels during differentiation. **a** Western blot of total H3K4me3, H3K27ac and H3K4me1 at each differentiation time point; histone H3 and  $\gamma$ -tubulin were used as loading controls. **b** Quantification of Western blots as in **a** relative  $\gamma$ -tubulin and total H3; mean  $\pm$  SD (min-max) from 2 differentiations; no significant differences are detected between time points. **c** Heatmaps of H3K4me3, H3K27ac and H3K4me1 distribution around the TSS  $\pm$  4 kb in the 0-72 h differentiation time course; read counts normalized to library size.

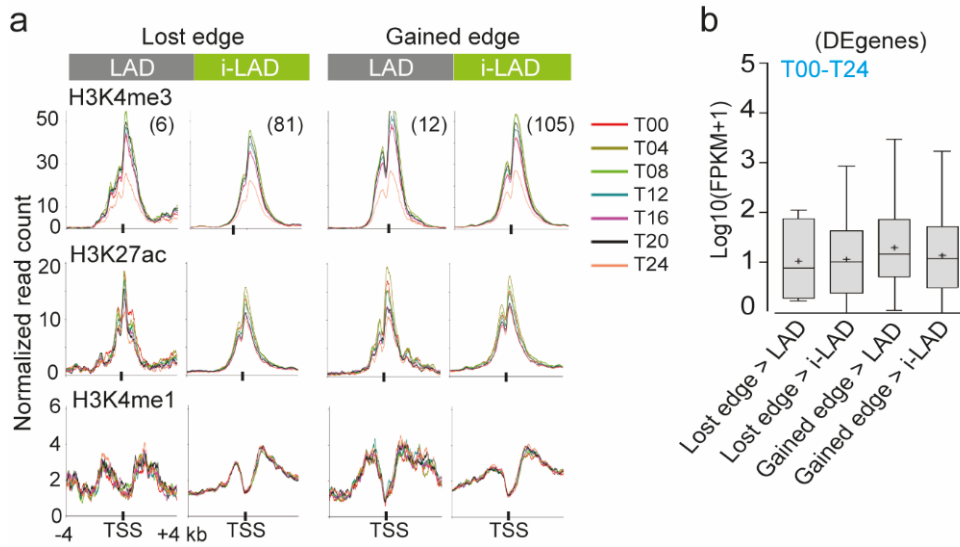

**Figure S7.** H3K4me3, H3K27ac and H3K4me1 levels and patterns around TSSs of genes localized in lost or gained edges during differentiation. **a** H3K4me3, H3K27ac and H3K4me1 levels at the TSS  $\pm$  4 kb in the T00-T24 time course; data are shown as mean ChIP-seq read counts normalized to library size. **b** Expression level of DE genes in lost and gained edge classes, averaged across the T00-T24 time course; bar, median; cross, mean; box, 25-75% percentile; whiskers, min-max. There are no significant differences between these LAD classes.

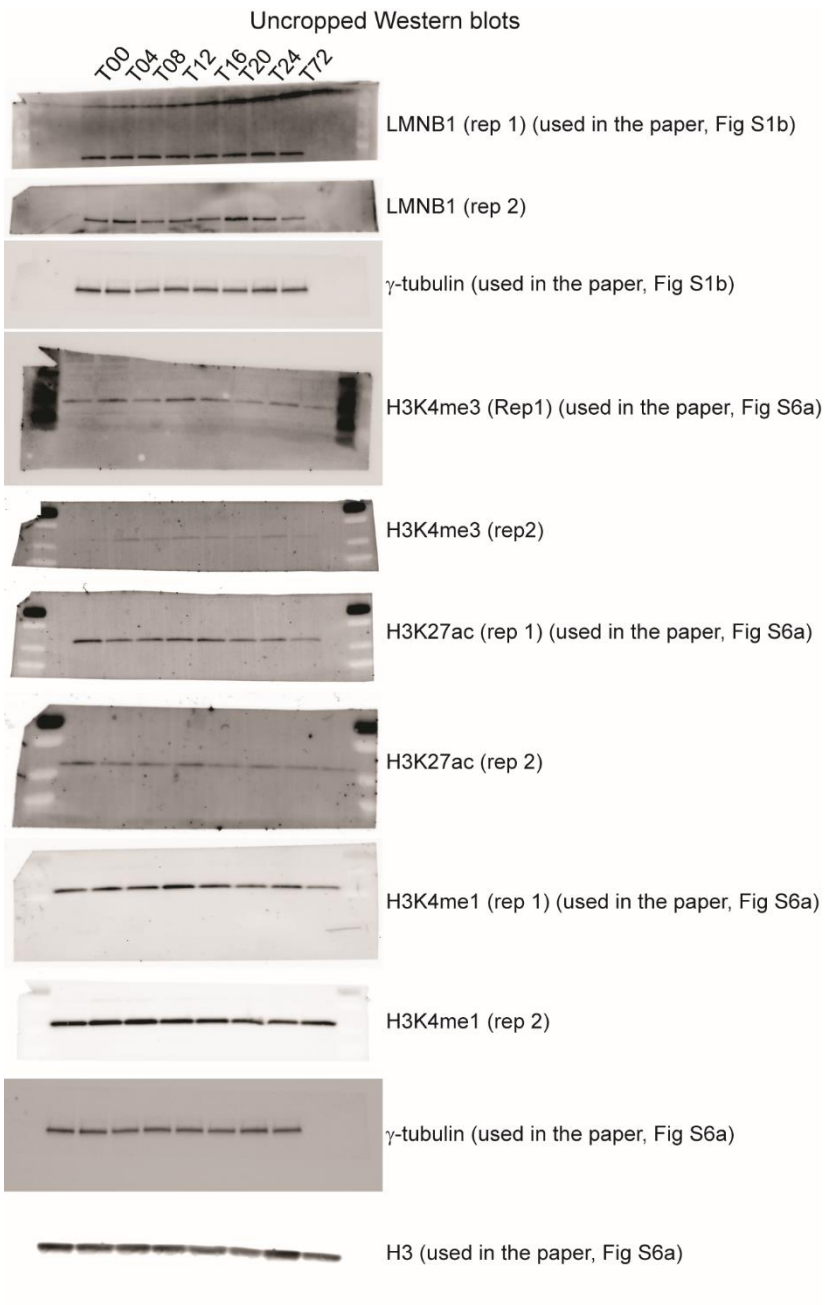

**Figure S8.** Uncropped Western blots.
